# Supplementary material for: Gut microbiome response to a modern Paleolithic diet in a Western lifestyle context
Source: PLoS One. 2019 Aug 8;14(8):e0220619. doi: 10.1371/journal.pone.0220619 (PMC6687155; doi:10.1371/journal.pone.0220619)
Supplement: S4 Table — MPD: modern Paleolithic diet; MD: Mediterranean diet; ava: average abundance of group a; avb: average abundance of group b. (XLSX) [file pone.0220619.s007.xlsx]

## Sheet: simper
S4 Table. Percentage contribution of the main bacterial genera to the community structure based on SIMPER analysis. MPD: Modern Paleolithic Diet; MD: Mediterranean Diet; ava: average abundance of group a; avb: average abundance of group b.
	genera	ava	avb	contribution	cumulative contribution
MPD vs MD	Prevotella	7.4195	10.3133	12.6576	12.6576
	Bacteroides	13.6989	16.1337	11.5237	24.1813
	Unassigned;Other;Other;Other;Other;Other	0.870322	8.56369	7.16087	31.3422
	Ruminococcaceae;g__	14.6127	13.8879	6.53497	37.8771
	Clostridiales;f__;g__	8.00696	4.58106	4.62796	42.5051
	Faecalibacterium	7.16275	5.1206	4.36922	46.8743
	Blautia	3.41166	5.35841	3.51414	50.3884
	Ruminococcus	3.89034	3.31757	3.50649	53.8949
	Lachnospiraceae;Other	0.10879	3.70967	3.31594	57.2109
	Coprococcus	4.43864	3.18109	2.99627	60.2071
	Lachnospiraceae;g__	5.35248	4.52583	2.81826	63.0254
	Enterobacteriaceae;g__	2.37598	0.0657306	2.18343	65.2088
	Phascolarctobacterium	2.1497	0.227318	1.9643	67.1731
	Lachnospira	2.36292	0.743578	1.89079	69.0639
	Streptococcus	1.60574	0.882799	1.85726	70.9212
	Rikenellaceae;g__	0.683203	2.12575	1.8472	72.7684
	Clostridiales;Other;Other	1.17929	2.36585	1.60471	74.3731
	Bifidobacterium	0.966057	0.896036	1.58065	75.9538
	Dialister	0.879025	1.27992	1.57289	77.5266
	Erysipelotrichaceae;g__	1.11836	1.54056	1.36161	78.8883
	Clostridiaceae;g__	1.11401	1.31279	1.32289	80.2111
	[Eubacterium]	1.02263	0.76777	1.31166	81.5228
	Roseburia	1.30113	0.467874	1.19744	82.7202
	Akkermansia	1.19234	0.0191714	1.09603	83.8163
MPD vs Hadza	Ruminococcaceae;g__	14.6127	30.1446	14.1886	14.1886
	Bacteroides	13.6989	0.215163	11.9075	26.0961
	Prevotella	7.4195	6.41621	7.20426	33.3004
	Bacteroidales;f__;g__	0.126197	7.15598	6.21084	39.5112
	Faecalibacterium	7.16275	7.18983	4.69866	44.2099
	Clostridiales;f__;g__	8.00696	6.00039	3.35484	47.5647
	Coprococcus	4.43864	1.129	3.07034	50.635
	Treponema	0.0304613	2.92525	2.56566	53.2007
	Succinivibrio	0	2.78261	2.45721	55.6579
	Lachnospiraceae;g__	5.35248	6.54192	2.38733	58.0452
	Ruminococcus	3.89034	2.41273	2.26863	60.3139
	Enterobacteriaceae;g__	2.37598	0.241756	2.09614	62.41
	Blautia	3.41166	2.84789	1.9373	64.3473
	Lachnospira	2.36292	0.205493	1.92791	66.2752
	[Eubacterium]	1.02263	2.07427	1.80423	68.0795
	Phascolarctobacterium	2.1497	0.630983	1.65764	69.7371
	Streptococcus	1.60574	0.038681	1.4063	71.1434
	[Prevotella]	0.5396	1.00571	1.13688	72.2803
	Catenibacterium	0.117493	1.25713	1.11283	73.3931
	Ruminobacter	0	1.2257	1.08237	74.4755
	Akkermansia	1.19234	0	1.05291	75.5284
	Christensenellaceae;g__	0.78329	1.02263	1.04906	76.5774
	Roseburia	1.30113	1.02263	1.04323	77.6207
	S24-7;g__	0.382942	1.2112	1.04138	78.662
	RF39;f__;g__	0.0217581	1.15318	1.00196	79.664
MPD vs Inuit	Bacteroides	13.6989	24.2136	13.0824	13.0824
	Enterobacteriaceae;g__	2.37598	11.8177	11.4279	24.5103
	Prevotella	7.4195	5.33383	8.31821	32.8285
	Ruminococcaceae;g__	14.6127	6.44349	8.00169	40.8302
	Clostridiales;f__;g__	8.00696	5.00124	4.75165	45.5818
	Faecalibacterium	7.16275	3.62116	4.52847	50.1103
	Lachnospiraceae;g__	5.35248	8.19346	4.14573	54.256
	Coprococcus	4.43864	1.81835	2.85402	57.1101
	Ruminococcus	3.89034	2.26284	2.71586	59.8259
	Bilophila	0.0739774	2.698	2.38772	62.2136
	Rikenellaceae;g__	0.683203	2.42136	1.92383	64.1375
	Blautia	3.41166	1.70645	1.91221	66.0497
	Lachnospira	2.36292	0.991545	1.87513	67.9248
	S24-7;g__	0.382942	1.85876	1.80762	69.7324
	Parabacteroides	0.609225	2.36852	1.80504	71.5375
	Phascolarctobacterium	2.1497	0.972896	1.70525	73.2427
	Streptococcus	1.60574	0.581251	1.60067	74.8434
	Bifidobacterium	0.966057	0.718016	1.26995	76.1133
	Sutterella	0.796345	1.6878	1.2598	77.3732
	[Eubacterium]	1.02263	0.870322	1.25298	78.6261
	Akkermansia	1.19234	0.559493	1.21	79.8361
	Clostridiaceae;g__	1.11401	0.742882	1.16592	81.0021
	Dialister	0.879025	0.652742	1.10081	82.1029
	Roseburia	1.30113	0.888972	1.00581	83.1087
MPD vs Matses	Bacteroides	13.6989	0.321149	10.6502	10.6502
	Prevotella	7.4195	12.6214	9.85402	20.5043
	Ruminococcaceae;g__	14.6127	21.6162	9.08385	29.5881
	Treponema	0.0304613	8.73629	6.94419	36.5323
	Faecalibacterium	7.16275	0.224543	5.51946	42.0518
	Clostridiales;f__;g__	8.00696	10.4543	4.73682	46.7886
	Succinivibrio	0	5.09922	4.05651	50.8451
	Clostridium	0.726719	4.94256	3.45901	54.3041
	RF39;f__;g__	0.0217581	4.05483	3.20976	57.5139
	Coprococcus	4.43864	0.963446	2.87729	60.3912
	Catenibacterium	0.117493	3.22715	2.5325	62.9237
	Ruminococcus	3.89034	3.44909	2.36883	65.2925
	Lachnospiraceae;g__	5.35248	3.81462	2.24836	67.5408
	Enterobacteriaceae;g__	2.37598	1.11749	2.24185	69.7827
	Blautia	3.41166	0.963446	2.02154	71.8042
	Phascolarctobacterium	2.1497	0.801567	1.86368	73.6679
	Lachnospira	2.36292	1.16449	1.5812	75.2491
	Streptococcus	1.60574	0.608355	1.4401	76.6892
	YS2;f__;g__	0.10879	1.6188	1.2209	77.9101
	[Eubacterium]	1.02263	1.14621	1.16537	79.0755
bold: P-value < 0.05 (SIMPER analysis)
